# Supplementary material
Source: PubMed Central journal article supplement (PMC1142571)
Supplement: 7600636s1.pdf [file 7600636s1.pdf]

**Supplementary table 1**  
**Yeast strains and plasmids used in this study**

| Strain/plasmids | Genotype[plasmid](plasmid number)                                            | Source                           |
|-----------------|------------------------------------------------------------------------------|----------------------------------|
| <b>Strains</b>  |                                                                              |                                  |
| W303-1a         | <i>MATa ade2 his3 leu2 trp1 ura3 can1</i>                                    | Lab stock                        |
| YS002           | <i>ski7::cgHIS3</i>                                                          | (Takahashi <i>et al.</i> , 2003) |
| YS088           | <i>dcp1::cgHIS3</i> , pTRPGAL1- <i>His6FLAG-dcp1-2</i>                       | (Takahashi <i>et al.</i> , 2003) |
| YS091           | <i>dcp1::cgHIS3</i> , <i>ski7::cgLEU2</i> , pTRPGAL1- <i>His6FLAG-dcp1-2</i> | (Takahashi <i>et al.</i> , 2003) |
| BY4741          | <i>MATa leu2-Δ0 ura3-Δ0 his3-Δ0 met15-Δ0</i>                                 | (van Hoof <i>et al.</i> , 2002)  |
| KO1852          | BY4741 <i>ski7Δ</i>                                                          | (van Hoof <i>et al.</i> , 2002)  |
| YIT888          | <i>ski2Δ::cgTRP1</i>                                                         | This study                       |
| YIT890          | <i>ski3Δ::cgTRP1</i>                                                         | This study                       |
| YIT929          | <i>ski7Δ::cgTRP1</i>                                                         | This study                       |
| YIT874          | <i>pab1-FLAGHA cgTRP1</i>                                                    | This study                       |
| <b>Plasmids</b> |                                                                              |                                  |
| YCplac111       | <i>LEU2</i> , <i>CEN</i>                                                     | (Gietz and Sugino, 1988)         |
| YCplac33        | <i>URA3</i> , <i>CEN</i>                                                     | (Gietz and Sugino, 1988)         |
| p415GAL1        | <i>GAL1</i> promoter, <i>LEU2</i> , <i>CEN</i>                               | (Mumberg <i>et al.</i> , 1994)   |
| pCgTRP1         | <i>C. glabrata TRP1</i> in pUC19                                             | (Sakumoto <i>et al.</i> , 1999)  |
| pAV188          | <i>his3-ns</i>                                                               | (van Hoof <i>et al.</i> , 2002)  |
| pIT709          | <i>HIS3His<sub>6</sub></i> in YCplac111                                      | This study                       |
| pIT711          | <i>his3His<sub>6</sub>-ns</i> in YCplac111                                   | This study                       |
| pIT765          | <i>GAL1p-HIS3-His<sub>6</sub></i> in YCplac33                                | This study                       |
| pIT766          | <i>GAL1p-his3-His<sub>6</sub>-ns</i> in YCplac33                             | This study                       |
| pIT798          | <i>FLAG-HIS3</i> in YCplac111                                                | This study                       |
| pIT799          | <i>FLAG-his3-ns 3</i> in YCplac111                                           | This study                       |
| pIT810          | <i>GFP</i> in YCplac111                                                      | This study                       |
| pIT811          | <i>gfp-ns</i> in YCplac111                                                   | This study                       |
| pIT826          | <i>GAL1p-FLAG-HIS3</i> in YCplac33                                           | This study                       |
| pIT827          | <i>GAL1p-FLAG-his3-ns</i> in YCplac33                                        | This study                       |
| pIT859          | <i>GAL1p-GFP</i> in YCplac33                                                 | This study                       |
| pIT860          | <i>GAL1p-gfp-ns</i> in YCplac33                                              | This study                       |
| pIT922          | <i>GPDp-FLAG-HIS3</i> in YCplac33                                            | This study                       |
| pIT923          | <i>GPDp-FLAG-his3-ns</i> in YCplac33                                         | This study                       |
| pIT927          | <i>GAL1p-FLAG-his3-S2</i> in YCplac33                                        | This study                       |
| pIT928          | <i>GAL1p-FLAG-his3-S3</i> in YCplac33                                        | This study                       |
| pIT929          | <i>GAL1p-FLAG-his3-S4</i> in YCplac33                                        | This study                       |
| pIT938          | <i>FLAG-his3-S1</i> in YCplac111                                             | This study                       |
| pIT939          | <i>FLAG-his3-S2</i> in YCplac111                                             | This study                       |
| pIT940          | <i>FLAG-his3-S3</i> in YCplac111                                             | This study                       |
| pIT941          | <i>FLAG-his3-S4</i> in YCplac111                                             | This study                       |
